# Supplementary material
Source: MDPI journal article supplement (https://www.mdpi.com/2071-1050/10/2/525)
Supplement: s1 [file s1]

Archive with 2 entries (2 files):
- sustainability-254347-supplementary-2.pdf
- sustainability-254347-supplementary-1.pdf
